# Supplementary material for: Anti-correlation of HER2 and focal adhesion complexes in the plasma membrane
Source: PubMed Central journal article supplement (PMC7279600; doi:10.1371/journal.pone.0234430), 2020-06-08
Supplement: pone.0234430.s001.pdf [file pone.0234430.s001.pdf]

eGFP-vinculin

A

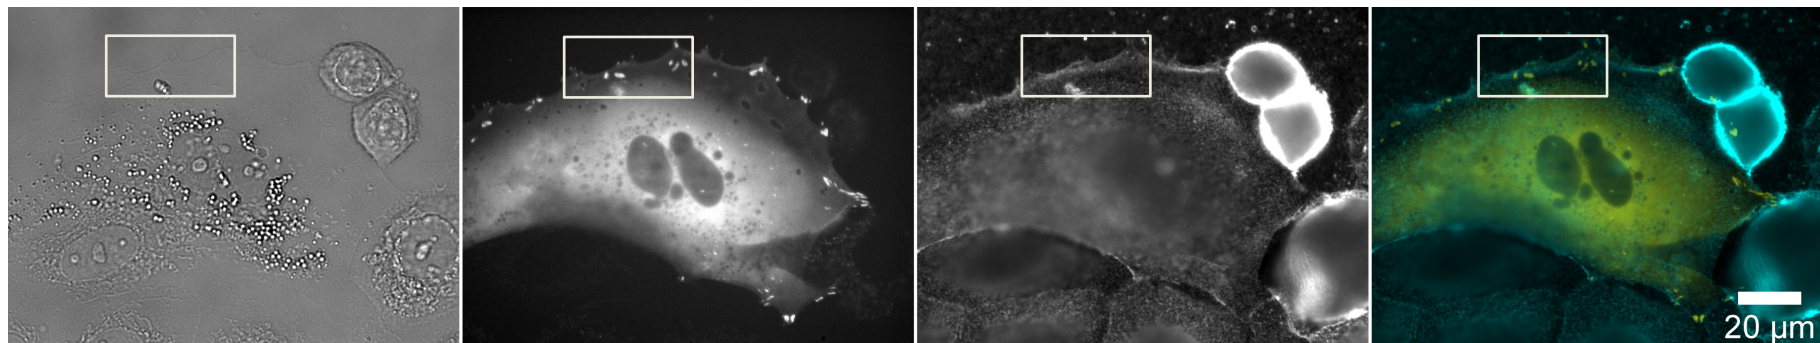

B

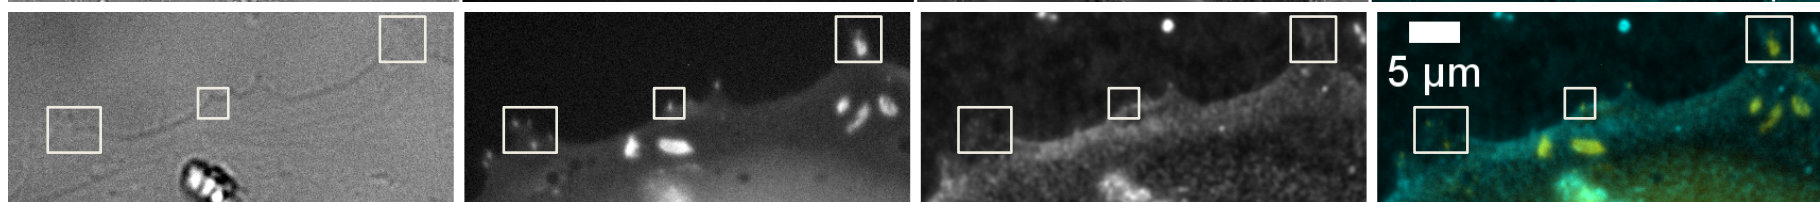

Talin-GFP

C

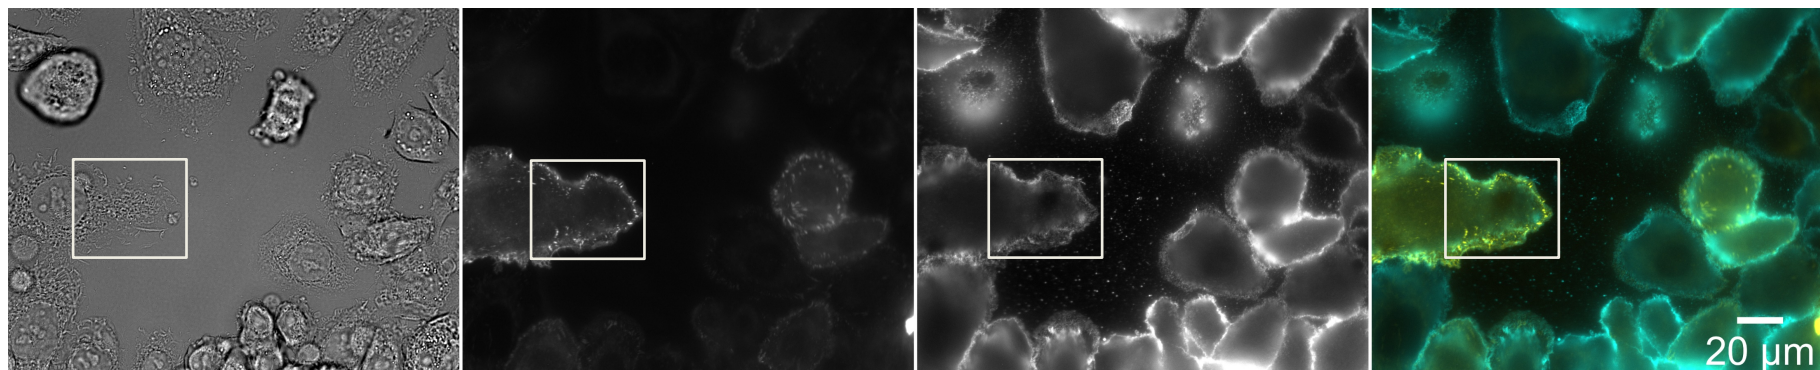

D

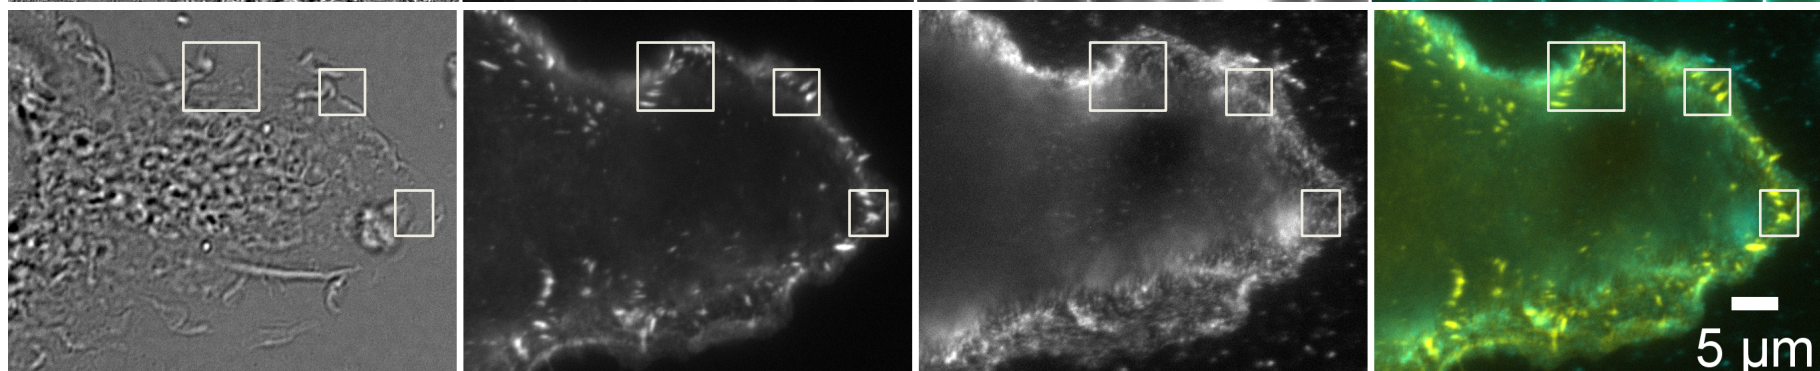

DIC

GFP

HER2-Aff-QD

Merge
