# Supplementary material for: Anti-correlation of HER2 and focal adhesion complexes in the plasma membrane
Source: PubMed Central journal article supplement (PMC7279600; doi:10.1371/journal.pone.0234430), 2020-06-08

DIC

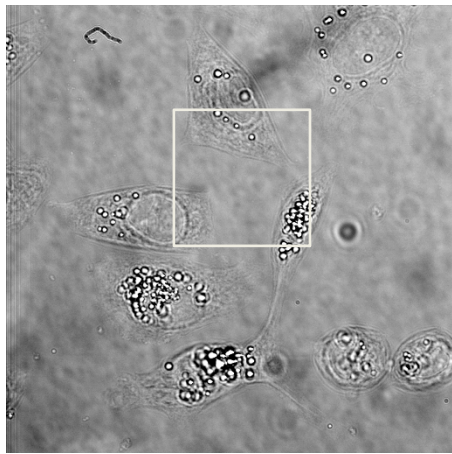

Talin-GFP

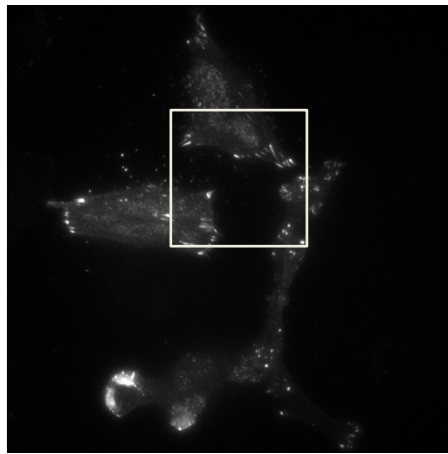

HER2-QD

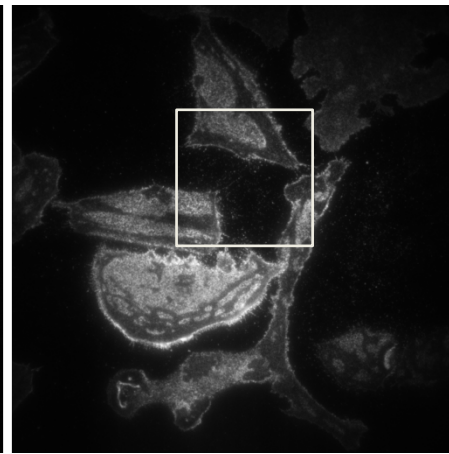

Merge

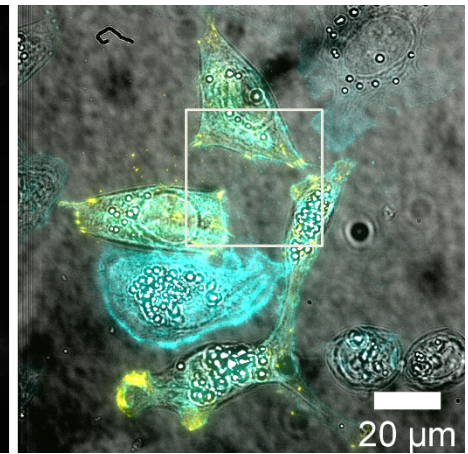

Supplement: pone.0234430.s002.pdf [file pone.0234430.s002.pdf]
