# Supplementary material for: Anti-correlation of HER2 and focal adhesion complexes in the plasma membrane
Source: PubMed Central journal article supplement (PMC7279600; doi:10.1371/journal.pone.0234430), 2020-06-08

**A**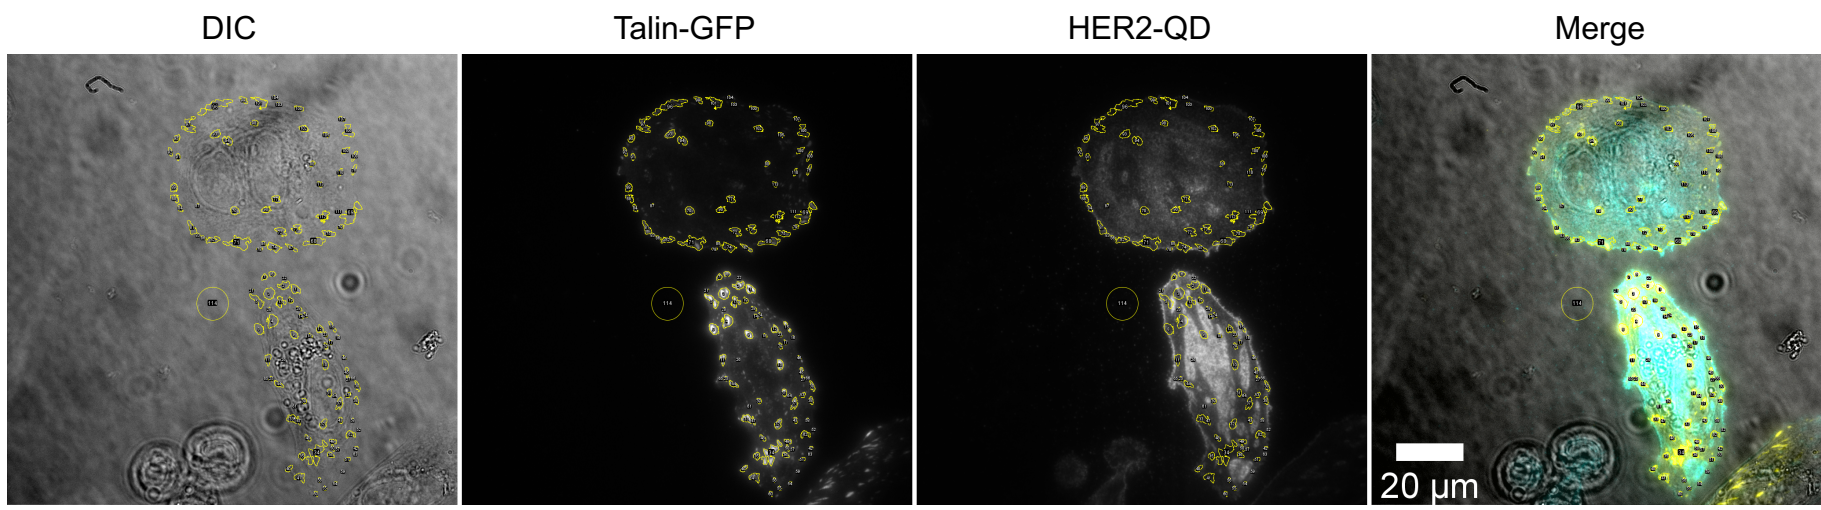**B**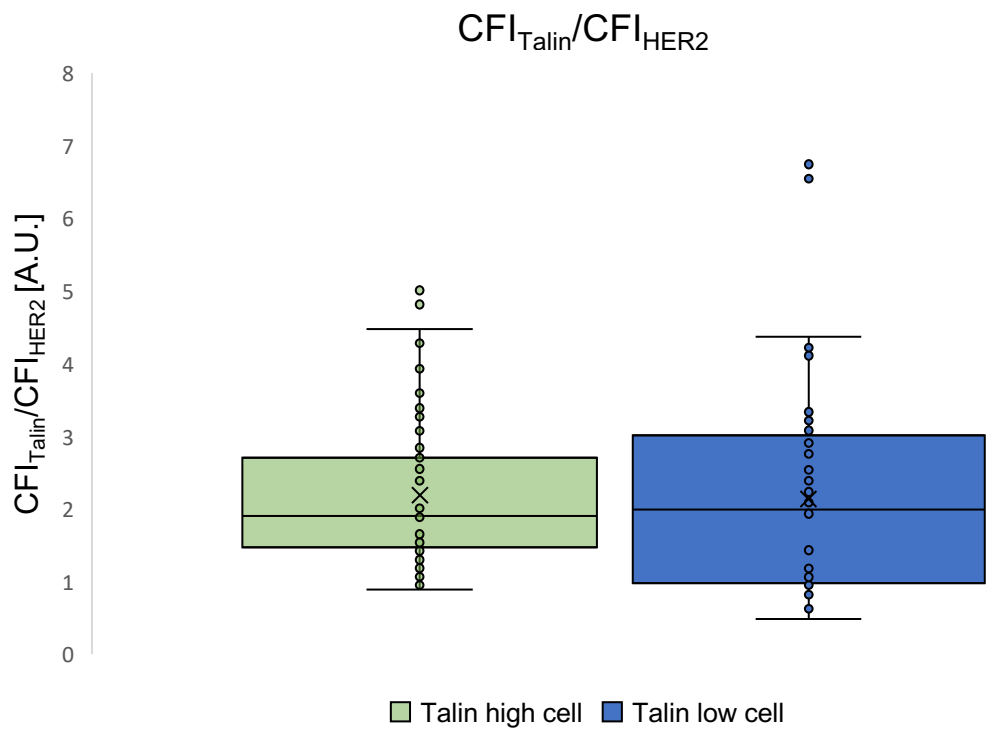

Supplement: pone.0234430.s003.pdf [file pone.0234430.s003.pdf]
